# Supplementary material
Source: PubMed Central journal article supplement (PMC7529706)
Supplement: NIHMS1585002-supplement-supp_info.pdf [file NIHMS1585002-supplement-supp_info.pdf]

## **SUPPLEMENTARY INFORMATION**

**LptB-LptF coupling mediates closure of the substrate-binding cavity in the LptB<sub>2</sub>FGC transporter through a rigid-body mechanism to extract LPS**

**Running title: Coupling of ATPase function to LPS extraction in LptB<sub>2</sub>FGC**

**Emily A. Lundstedt, Brent W. Simpson<sup>†</sup>, and Natividad Ruiz<sup>\*</sup>**

Department of Microbiology, The Ohio State University, Columbus, OH 43210, USA

\*For correspondence. E-mail [ruiz.82@osu.edu](mailto:ruiz.82@osu.edu); Tel. 614-292-3426; Fax 614-292-8120

<sup>†</sup>Present address: Department of Infectious Diseases, College of Veterinary Medicine, University of Georgia, Athens, Georgia, USA

**Table S1: Strains used in this study.**

| Strain       | Genotype                                                                                                                                                                                                                                  | Source                         |
|--------------|-------------------------------------------------------------------------------------------------------------------------------------------------------------------------------------------------------------------------------------------|--------------------------------|
| DH5 $\alpha$ | F <sup>-</sup> $\phi$ 80 <i>lacZ</i> $\Delta$ M15 $\Delta$ ( <i>lacZYA-argF</i> )U169 <i>recA1 endA1 hsdR17</i> ( <i>r<sub>K</sub><sup>-</sup>, m<sub>K</sub><sup>+</sup></i> ) <i>phoA supE44 <math>\lambda</math><sup>-</sup> thi-1</i> | Life Technologies              |
| NR1414       | NR754 (pET23/42)                                                                                                                                                                                                                          | (Sherman <i>et al.</i> , 2014) |
| NR754        | MC4100 <i>ara</i> <sup>+</sup>                                                                                                                                                                                                            | (Ruiz <i>et al.</i> , 2006)    |
| NR760        | NR754 <i>lptD4213</i>                                                                                                                                                                                                                     | (Ruiz <i>et al.</i> , 2006)    |
| NR4904       | NR754 <i>lptD4213 <math>\Delta</math>lpxM::kan</i>                                                                                                                                                                                        | This study                     |
| NR3936       | NR754 $\Delta$ <i>lptB</i> (pRC7KanLptB)                                                                                                                                                                                                  | This study                     |
| NR2583       | NR754 (pET23/42LptB)                                                                                                                                                                                                                      | (Simpson <i>et al.</i> , 2016) |
| NR4446       | NR754 $\Delta$ <i>lptB</i> (pET23/42LptB)                                                                                                                                                                                                 | This study                     |
| NR4805       | NR754 (pET23/42LptB/E86A)                                                                                                                                                                                                                 | This study                     |
| NR5522       | NR754 (pET23/42lptB/E86R)                                                                                                                                                                                                                 | This study                     |
| NR4978       | NR754 $\Delta$ <i>lptB</i> (pET23/42LptB/E86Q)                                                                                                                                                                                            | This study                     |
| NR4923       | NR754 $\Delta$ <i>lptB</i> (pET23/42LptB/E86D)                                                                                                                                                                                            | This study                     |
| NR4607       | NR754 $\Delta$ <i>lptB</i> (pET23/42LptB/E86A; pRC7KanLptB)                                                                                                                                                                               | This study                     |
| NR4979       | NR754 $\Delta$ <i>lptB</i> (pET23/42LptB/E86R; pRC7KanLptB)                                                                                                                                                                               | This study                     |
| NR4747       | NR754 $\Delta$ <i>lptB</i> (pET23/42LptB/E86A; pRC7CatSacBLptB)                                                                                                                                                                           | This study                     |
| NR4745       | NR754 $\Delta$ <i>lptB yjgN::tet</i> (pET23/42LptB/E86A; pRC7KanLptB)                                                                                                                                                                     | This study                     |
| NR5778       | NR754 $\Delta$ <i>lptB</i> (pET23/42LptB/E86A/R144H; pRC7CatSacBLptB)                                                                                                                                                                     | This study                     |
| NR3174       | NR754 $\Delta$ <i>lptB tet2</i> (pET23/42LptB/R144H)                                                                                                                                                                                      | (Simpson <i>et al.</i> , 2019) |
| NR3032       | NR754 $\Delta$ <i>lptB tet2</i> (pET23/42LptB/R144H-EHis8)                                                                                                                                                                                | (Simpson <i>et al.</i> , 2019) |
| NR1896       | NR754 $\Delta$ <i>lptB</i> (pET23/42LptB-EHis8)                                                                                                                                                                                           | (Simpson <i>et al.</i> , 2019) |
| NR5123       | NR754 $\Delta$ <i>lptB</i> (pET23/42LptB/E86A-EHis8; pRC7KanLptB)                                                                                                                                                                         | This study                     |
| NR5124       | NR754 $\Delta$ <i>lptB</i> (pET23/42LptB/E86A/G236A; pRC7KanLptB)                                                                                                                                                                         | This study                     |
| NR5125       | NR754 $\Delta$ <i>lptB</i> (pET23/42LptB/E86A/F239A; pRC7KanLptB)                                                                                                                                                                         | This study                     |
| NR5446       | NR754 $\Delta$ <i>lptB</i> (pET23/42LptB/E86Q-EHis8)                                                                                                                                                                                      | This study                     |
| NR5447       | NR754 $\Delta$ <i>lptB</i> (pET23/42LptB/E86Q/G236A; pRC7KanLptB)                                                                                                                                                                         | This study                     |
| NR6069       | NR754 $\Delta$ <i>lptB</i> (pET23/42LptB/E86Q/F239A)                                                                                                                                                                                      | This study                     |
| NR4855       | NR754 $\Delta$ <i>lpxM::kan</i>                                                                                                                                                                                                           | This study                     |
| NR4876       | NR754 $\Delta$ <i>lpxL::kan</i>                                                                                                                                                                                                           | This study                     |
| NR4887       | NR754 $\Delta$ <i>lpxP::kan</i>                                                                                                                                                                                                           | This study                     |
| NR5327       | NR754 $\Delta$ <i>lpxM::frit</i>                                                                                                                                                                                                          | This study                     |
| NR5328       | NR754 $\Delta$ <i>lpxP::frit</i>                                                                                                                                                                                                          | This study                     |
| NR5372       | NR754 $\Delta$ <i>lpxM::frit <math>\Delta</math>lpxP::kan</i>                                                                                                                                                                             | This study                     |
| NR5373       | NR754 $\Delta$ <i>lpxM::frit <math>\Delta</math>lpxL::kan</i>                                                                                                                                                                             | This study                     |
| NR5374       | NR754 $\Delta$ <i>lpxP::frit <math>\Delta</math>lpxL::kan</i>                                                                                                                                                                             | This study                     |
| NR5521       | NR754 $\Delta$ <i>lpxM::frit <math>\Delta</math>lpxP::frit</i>                                                                                                                                                                            | This study                     |
| NR5572       | NR754 $\Delta$ <i>lpxM::frit <math>\Delta</math>lpxP::frit <math>\Delta</math>lpxL::kan</i>                                                                                                                                               | This study                     |
| NR4868       | NR754 $\Delta$ <i>lptB <math>\Delta</math>lpxM::kan</i> (pRC7CatSacBLptB)                                                                                                                                                                 | This study                     |
| NR4872       | NR754 $\Delta$ <i>lptB <math>\Delta</math>lpxL::kan</i> (pRC7CatSacBLptB)                                                                                                                                                                 | This study                     |
| NR4888       | NR754 $\Delta$ <i>lptB <math>\Delta</math>lpxP::kan</i> (pRC7CatSacBLptB)                                                                                                                                                                 | This study                     |
| NR4944       | NR754 $\Delta$ <i>lptB <math>\Delta</math>lpxM::frit</i> (pRC7CatSacBLptB)                                                                                                                                                                | This study                     |
| NR5448       | NR754 $\Delta$ <i>lptB <math>\Delta</math>lpxP::frit</i> (pRC7CatSacBLptB)                                                                                                                                                                | This study                     |
| NR4924       | NR754 $\Delta$ <i>lptB <math>\Delta</math>lpxM::frit <math>\Delta</math>lpxP::kan</i> (pRC7CatSacBLptB)                                                                                                                                   | This study                     |

|        |                                                                                                                                      |                                |
|--------|--------------------------------------------------------------------------------------------------------------------------------------|--------------------------------|
| NR4925 | NR754 $\Delta$ <i>lptB tet2</i> $\Delta$ <i>lpxM::frit</i> $\Delta$ <i>lpxL::kan</i> (pRC7CatSacBLptB)                               | This study                     |
| NR5573 | NR754 $\Delta$ <i>lptB tet2</i> $\Delta$ <i>lpxP::frit</i> $\Delta$ <i>lpxL::kan</i> (pRC7CatSacBLptB)                               | This study                     |
| NR5329 | NR754 $\Delta$ <i>lptB</i> $\Delta$ <i>lpxM::frit</i> $\Delta$ <i>lpxP::frit</i> (pRC7CatSacBLptB)                                   | This study                     |
| NR4988 | NR754 $\Delta$ <i>lptB tet2</i> $\Delta$ <i>lpxM::frit</i> $\Delta$ <i>lpxP::frit</i> $\Delta$ <i>lpxL::kan</i> (pRC7CatSacBLptB)    | This study                     |
| NR4728 | NR754 $\Delta$ <i>lptB</i> $\Delta$ <i>lpxM::kan</i> (pET23/42LptB)                                                                  | This study                     |
| NR4854 | NR754 $\Delta$ <i>lptB</i> $\Delta$ <i>lpxM::kan</i> (pET23/42LptB/E86A)                                                             | This study                     |
| NR5458 | NR754 $\Delta$ <i>lptB</i> $\Delta$ <i>lpxM::kan</i> (pET23/42LptB/E86Q)                                                             | This study                     |
| NR5457 | NR754 $\Delta$ <i>lptB</i> $\Delta$ <i>lpxM::kan</i> (pET23/42LptB/E86D)                                                             | This study                     |
| NR6278 | NR754 $\Delta$ <i>lptB</i> $\Delta$ <i>lpxM::kan</i> (pET/42LptB/E86R; pRC7CatSacBLptB)                                              | This study                     |
| NR4940 | NR754 $\Delta$ <i>lptB</i> $\Delta$ <i>lpxM::kan</i> (pET23/42LptB/R144H)                                                            | This study                     |
| NR5779 | NR754 $\Delta$ <i>lptB</i> $\Delta$ <i>lpxM::kan</i> (pET23/42LptB/E86A/R144H; pRC7CatSacBLptB)                                      | This study                     |
| NR4932 | NR754 $\Delta$ <i>lptB</i> $\Delta$ <i>lpxM::kan</i> (pET23/42LptB-EHis8; pRC7CatSacBLptB)                                           | This study                     |
| NR4877 | NR754 $\Delta$ <i>lptB</i> $\Delta$ <i>lpxL::kan</i> (pET23/42LptB)                                                                  | This study                     |
| NR5900 | NR754 $\Delta$ <i>lptB</i> $\Delta$ <i>lpxL::kan</i> (pET23/42LptB/E86Q)                                                             | This study                     |
| NR5973 | NR754 $\Delta$ <i>lptB</i> $\Delta$ <i>lpxL::kan</i> (pET23/42LptB/E86A)                                                             | This study                     |
| NR4933 | NR754 $\Delta$ <i>lptB</i> $\Delta$ <i>lpxL::kan</i> (pET23/42LptB/E86A; pRC7CatSacBLptB)                                            | This study                     |
| NR5972 | NR754 $\Delta$ <i>lptB</i> $\Delta$ <i>lpxL::kan</i> (pET23/42LptB/R144H)                                                            | This study                     |
| NR4889 | NR754 $\Delta$ <i>lptB</i> $\Delta$ <i>lpxP::kan</i> (pET23/42LptB)                                                                  | This study                     |
| NR5971 | NR754 $\Delta$ <i>lptB</i> $\Delta$ <i>lpxP::kan</i> (pET23/42LptB/E86Q)                                                             | This study                     |
| NR4947 | NR754 $\Delta$ <i>lptB</i> $\Delta$ <i>lpxP::kan</i> (pET23/42LptB/E86A; pRC7CatSacBLptB)                                            | This study                     |
| NR5970 | NR754 $\Delta$ <i>lptB</i> $\Delta$ <i>lpxP::kan</i> (pET23/42LptB/R144H)                                                            | This study                     |
| NR4980 | NR754 $\Delta$ <i>lptB</i> $\Delta$ <i>lpxM::frit</i> $\Delta$ <i>lpxP::kan</i> (pET23/42LptB)                                       | This study                     |
| NR5974 | NR754 $\Delta$ <i>lptB</i> $\Delta$ <i>lpxM::frit</i> $\Delta$ <i>lpxP::kan</i> (pET23/42LptB/E86Q)                                  | This study                     |
| NR4981 | NR754 $\Delta$ <i>lptB</i> $\Delta$ <i>lpxM::frit</i> $\Delta$ <i>lpxP::kan</i> (pET23/42LptB/E86A)                                  | This study                     |
| NR4982 | NR754 $\Delta$ <i>lptB</i> $\Delta$ <i>lpxM::frit</i> $\Delta$ <i>lpxP::kan</i> (pET23/42LptB/R144H)                                 | This study                     |
| NR4984 | NR754 $\Delta$ <i>lptB tet2</i> $\Delta$ <i>lpxM::frit</i> $\Delta$ <i>lpxL::kan</i> (pET23/42LptB)                                  | This study                     |
| NR5975 | NR754 $\Delta$ <i>lptB tet2</i> $\Delta$ <i>lpxM::frit</i> $\Delta$ <i>lpxL::kan</i> (pET23/42LptB/E86Q)                             | This study                     |
| NR4986 | NR754 $\Delta$ <i>lptB tet2</i> $\Delta$ <i>lpxM::frit</i> $\Delta$ <i>lpxL::kan</i> (pET23/42LptB/R144H)                            | This study                     |
| NR4985 | NR754 $\Delta$ <i>lptB tet2</i> $\Delta$ <i>lpxM::frit</i> $\Delta$ <i>lpxL::kan</i> (pET23/42LptB/E86A)                             | This study                     |
| NR4975 | NR754 $\Delta$ <i>lptB tet2</i> $\Delta$ <i>lpxP::frit</i> $\Delta$ <i>lpxL::kan</i> (pET23/42LptB)                                  | This study                     |
| NR6141 | NR754 $\Delta$ <i>lptB tet2</i> $\Delta$ <i>lpxP::frit</i> $\Delta$ <i>lpxL::kan</i> (pET23/42LptB/E86Q)                             | This study                     |
| NR4976 | NR754 $\Delta$ <i>lptB tet2</i> $\Delta$ <i>lpxL::frit</i> $\Delta$ <i>lpxP::kan</i> (pET23/42LptB/E86A)                             | This study                     |
| NR4977 | NR754 $\Delta$ <i>lptB tet2</i> $\Delta$ <i>lpxL::frit</i> $\Delta$ <i>lpxP::kan</i> (pET23/42LptB/R144H)                            | This study                     |
| NR6142 | NR754 $\Delta$ <i>lptB tet2</i> $\Delta$ <i>lpxM::frit</i> $\Delta$ <i>lpxP::frit</i> $\Delta$ <i>lpxL::kan</i> (pET23/42LptB)       | This study                     |
| NR6143 | NR754 $\Delta$ <i>lptB tet2</i> $\Delta$ <i>lpxM::frit</i> $\Delta$ <i>lpxP::frit</i> $\Delta$ <i>lpxL::kan</i> (pET23/42LptB/E86Q)  | This study                     |
| NR6145 | NR754 $\Delta$ <i>lptB tet2</i> $\Delta$ <i>lpxM::frit</i> $\Delta$ <i>lpxP::frit</i> $\Delta$ <i>lpxL::kan</i> (pET23/42LptB/R144H) | This study                     |
| NR6144 | NR754 $\Delta$ <i>lptB tet2</i> $\Delta$ <i>lpxM::frit</i> $\Delta$ <i>lpxP::frit</i> $\Delta$ <i>lpxL::kan</i> (pET23/42LptB/E86A)  | This study                     |
| NR2759 | NR754 $\Delta$ <i>lptFG</i> (pRC7KanLptFG)                                                                                           | (Simpson <i>et al.</i> , 2016) |
| NR4973 | NR754 $\Delta$ <i>lptFG</i> $\Delta$ <i>lpxM::frit</i> (pRC7KanLptFG)                                                                | This study                     |
| NR2761 | NR754 $\Delta$ <i>lptFG</i> (pBAD18LptFG3)                                                                                           | (Simpson <i>et al.</i> , 2016) |
| NR3079 | NR754 (pBAD18LptFG3)                                                                                                                 | (Simpson <i>et al.</i> , 2016) |
| NR4831 | NR754 <i>yjgN::tet</i> $\Delta$ <i>lptB</i> (pET23/42LptB)                                                                           | This study                     |
| NR3265 | NR754 $\Delta$ <i>lptFG</i> (pBAD18LptFG3/LptF/E84A)                                                                                 | (Simpson <i>et al.</i> , 2016) |
| NR2762 | NR754 $\Delta$ <i>lptFG</i> (pBAD18LptFG3/LptG/E88A)                                                                                 | (Simpson <i>et al.</i> , 2016) |

|        |                                                                           |                                |
|--------|---------------------------------------------------------------------------|--------------------------------|
| NR3327 | NR754 $\Delta lptFG$ (pBAD18LptFG3/LptF/E84A/LptG/E88A)                   | (Simpson <i>et al.</i> , 2016) |
| NR5036 | NR754 $\Delta lptFG \Delta lpxM::frit$ (pBAD18LptFG3/LptF/E84A)           | This study                     |
| NR5037 | NR754 $\Delta lptFG \Delta lpxM::frit$ (pBAD18LptFG3/LptG/E88A)           | This study                     |
| NR5038 | NR754 $\Delta lptFG \Delta lpxM::frit$ (pBAD18LptFG3/LptF/E84A/LptG/E88A) | This study                     |
| NR3740 | NR754 $\Delta lptFG$ (pBAD18LptFG3/LptG/K34A)                             | (Bertani <i>et al.</i> , 2018) |
| NR5575 | NR754 $\Delta lptFG \Delta lpxM::frit$ (pBAD18LptFG3/LptG/K34A)           | This study                     |
| NR6340 | NR754 $\Delta lptFG$ (pBAD18LptFG3/LptF/E84A/LptG/A110V)                  | This study                     |
| NR6341 | NR754 $\Delta lptFG$ (pBAD18LptFG3/LptG/E88A/A110V)                       | This study                     |
| NR6342 | NR754 $\Delta lptFG$ (pBAD18LptFG3/LptF/E84A/LptG/E88A/A110V)             | This study                     |
| NR6343 | NR754 $\Delta lptFG$ (pBAD18LptFG3/LptF/E84A/LptG/L74P)                   | This study                     |
| NR6344 | NR754 $\Delta lptFG$ (pBAD18LptFG3/LptG/L74P/E88A)                        | This study                     |
| NR6345 | NR754 $\Delta lptFG$ (pBAD18LptFG3/LptF/E84A/LptG/L74P/E88A)              | This study                     |
| NR3259 | NR754 $\Delta lptFG$ (pBAD18LptFG3/LptF/S83A)                             | (Simpson <i>et al.</i> , 2016) |
| NR6338 | NR754 $\Delta lptFG$ (pBAD18LptFG3/LptF/S83A/LptG/S87A)                   | This study                     |
| NR6339 | NR754 $\Delta lptFG$ (pBAD18LptFG3/LptG/S87A)                             | This study                     |
| NR4126 | NR754 $yjgN::tet$                                                         | This study                     |
| NR6048 | NR754 $yjgN::tet lptGL74P$                                                | This study                     |
| NR6049 | NR754 $yjgN::tet lptGL74P \Delta lptB$ (pRC7KanLptB)                      | This study                     |
| NR6071 | NR754 $yjgN::tet lptGL74P \Delta lptB$ (pET23/42LptB)                     | This study                     |
| NR6072 | NR754 $yjgN::tet lptGL74P \Delta lpxM::kan$                               | This study                     |
| NR6073 | NR754 $yjgN::tet lptGL74P \Delta lptB$ (pET23/42LptB/E86A)                | This study                     |
| NR6074 | NR754 $yjgN::tet lptGL74P \Delta lptB$ (pET23/42LptB/E86Q)                | This study                     |
| NR6075 | NR754 $yjgN::tet lptGL74P \Delta lptB$ (pET23/42LptB/R144H)               | This study                     |
| NR6077 | NR754 $yjgN::tet lptGL74P \Delta lptB$ (pET23/42LptB-EHis8; pRC7KanLptB)  | This study                     |
| NR6328 | NR754 $yjgN::tet \Delta lpxM::kan$                                        | This study                     |
| NR6329 | NR754 $\Delta lptFG$ (pBAD18LptFG3/LptG/L74P)                             | This study                     |
| NR6330 | NR754 $\Delta lptFG$ (pBAD18LptFG3/LptG/A110V)                            | This study                     |
| NR5065 | NR754 $yjgN::tet lptGA110V$                                               | This study                     |
| NR5406 | NR754 $yjgN::tet lptGA110V \Delta lptB$ (pRC7KanLptB)                     | This study                     |
| NR5425 | NR754 $yjgN::tet lptGA110V \Delta lptB$ (pRC7KanLptB; pET23/42LptB/R144H) | This study                     |
| NR5427 | NR754 $yjgN::tet lptGA110V \Delta lptB$ (pRC7KanLptB; pET23/42LptB-EHis8) | This study                     |
| NR5464 | NR754 $yjgN::tet lptGA110V \Delta lpxM::kan$                              | This study                     |
| NR5479 | NR754 $yjgN::tet lptGA110V \Delta lptB$ (pET23/42LptB)                    | This study                     |
| NR5485 | NR754 $yjgN::tet lptGA110V \Delta lptB$ (pET23/42LptB/E86Q)               | This study                     |
| NR5492 | NR754 $yjgN::tet lptGA110V \Delta lptB$ (pET23/42LptB/E86A)               | This study                     |

**Table S2: Primers used in this study.**

| <b>Primer Name</b> | <b>Sequence (5'-3')</b>           |
|--------------------|-----------------------------------|
| LptBE86Asense      | CTATCTGCCACAGGCTGCCTCCATTTTCCG    |
| LptBE86Aanti       | CGGAAAATGGAGGCAGCCTGTGGCAGATAG    |
| LptBE86DFwd        | TATCTGCCACAGGATGCCTCCATTTTC       |
| LptBE86DRev        | GAAAATGGAGGCATCCTGTGGCAGATA       |
| LptBE86QFwd        | TATCTGCCACAGCAACCTCCATTTTCC       |
| LptBE86QRev        | GGAAAATGGAGGTTGCTGTGGCAGATA       |
| LptBE86RFwd        | TATCTGCCACAGAGACCTCCATTTTCC       |
| LptBE86RRev        | GGAAAATGGAGGTCTCTGTGGCAGATA       |
| LptBG236Asense     | GCGTGTATACCTTGCAGAAGACTTCAGACTC   |
| LptBG236Aanti      | GAGTCTGAAGTCTTCTGCAAGGTATACACGC   |
| LpxMFwd            | GTACGCAGTCAGTACCGGCTTTTTTTA       |
| LpxMRev            | TCCGGCCTACAGTTCAATGATAGTTCA       |
| LpxLFwd            | CAATTTCCGCCAGTCTTCAGCCAC          |
| LpxLRev            | CGCAATCCAGAGAGCTTTTATCGC          |
| LpxPFwd            | CAGGAACCATTGTCGTACATGATG          |
| LpxPRev            | CATGAGGTTATTATGGCCGATTTG          |
| LptGA110VFwd       | AAAACCGTAATTCCGCTGGTCTTGCTGACG    |
| LptGA110VRev       | CGGAATTACGGTTTTTCATCACCGACAGCGC   |
| 5LptGL74P          | GCTCTGCCTGGGGCGTTGCTTGGTCTTGGG    |
| 3LptGL74P          | CGCCCCAGGCAGAGCCGCCATCGGGAAGAA    |
| 5lptF79UP          | TCAAGAGAATAAATGACGTTTAAGCC        |
| 3lptG226DWN        | GCCAAGTGACGAATCAGATTG             |
| LptGS87AFwd        | GCGCAGCGCGCAGAAGTGGTGGTGATGCAGGC  |
| LptGS87ARev        | CACCAGTTCTGCGCGCTGCGCCAGCATCCCAAG |

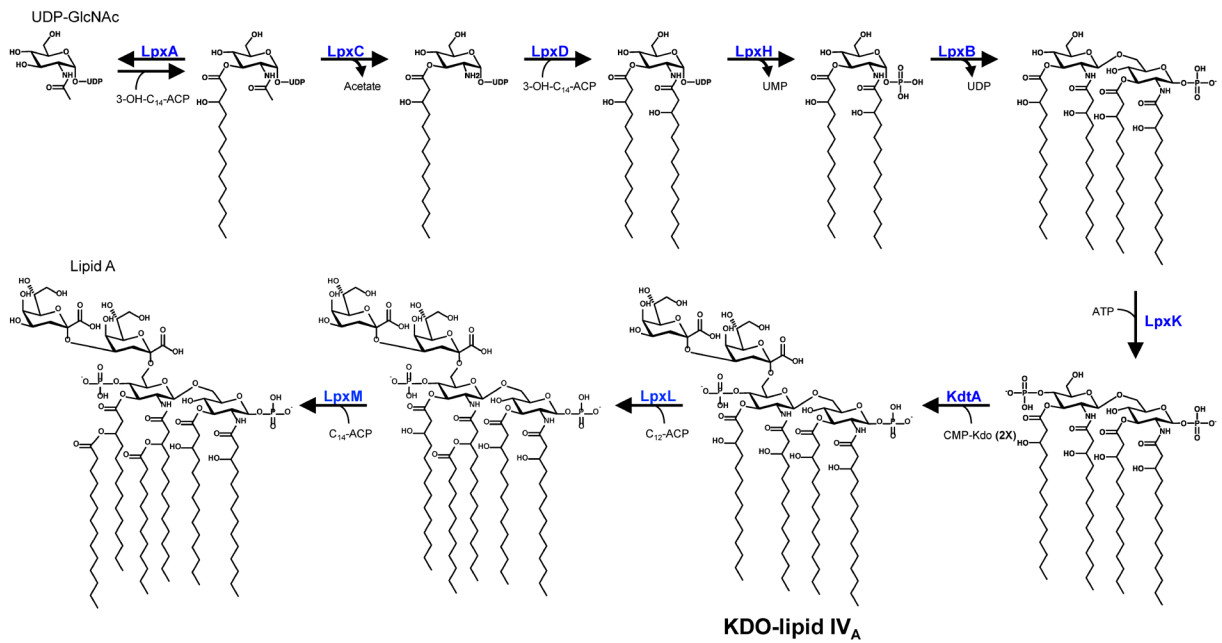

**Figure S1: The Raetz pathway.** The Raetz pathway for lipid A biosynthesis. Enzyme names are colored blue.

**A**

|                                    |            |        |           |            |
|------------------------------------|------------|--------|-----------|------------|
|                                    | 90         | 100    | 110       | 120        |
| <i>Gramella</i> /1-246             | PMYKRAQHG  | IGYLAQ | EASVFRKLS | IEDNIMSVL  |
| <i>Anabaena</i> /1-242             | PMHKRARLG  | IGYLAQ | EASVFRQL  | SVQDNILLVF |
| <i>Elusimicrobium</i> /1-239       | PMFERARHGL | GYLAQ  | EPTIFKGLT | VEENLLAVL  |
| <i>Sulfurihydrogenibium</i> /1-243 | PVYKRAKKG  | ISFLPQ | ESSIFRDLT | VWENLMMFL  |
| <i>Caulobacter</i> /1-252          | PMFQRARLG  | VGYLPQ | EASIFRGMT | VEQNVMAVV  |
| <i>Rhizobium</i> /1-258            | PMYRRSRLG  | VGYLPQ | EASIFRGLT | VEENIRAVL  |
| <i>Denitrovibrio</i> /1-239        | SMHKRSLRG  | IGYLPQ | EPVFRKMS  | VYDNIYAAL  |
| <i>Campylobacter</i> /1-242        | PLNKRARSG  | IGYLPQ | ESSIFKDL  | SVEDNLLAA  |
| <i>Geobacter</i> /1-246            | PMYLARAKG  | ISYLPQ | EPVFRKLT  | VEENLMAVL  |
| <i>Neisseria</i> /1-254            | PIHERARLG  | VGYLPQ | EASIFRKMT | VEQNIIRA   |
| <i>Pseudomonas</i> /1-241          | PMHGRARAG  | IGYLPQ | EASIFRKLS | VSDNIMAIL  |
| <i>Escherichia</i> /1-241          | PLHARARRG  | IGYLPQ | EASIFRRLS | VYDNLMAVL  |
| <i>Yersinia</i> /1-241             | PLHERARRG  | IGYLPQ | EASIFRRLS | VFNLLMAVL  |

**B**

|                          |        |            |            |                   |
|--------------------------|--------|------------|------------|-------------------|
|                          | 90     | 100        | 110        | 120               |
| <i>ECOLI LivG</i> /1-255 | GLPG   | -----      | QQIARMGV   | VRTFCHVRLFREMTV   |
| <i>ECOLI LptB</i> /1-241 | LLPL   | -----      | HARARRG    | IGYLPQ            |
| <i>ECOLI LivF</i> /1-237 | DWQT   | -----      | AKIMREAVA  | IVPEGRRVFSRMTV    |
| <i>ECOLI MetN</i> /1-343 | TLSE   | ----       | SELTK-ARRQ | IGMIFCHFNLSSRTV   |
| <i>ECOLI LoID</i> /1-233 | KLSS   | ----       | AAKAELRNQ  | KLGFICYCFHLLPDFTA |
| <i>ECOLI FecE</i> /1-255 | MLS    | -----      | SRQLARRL   | SLLPCHHLTPEGITV   |
| <i>ECOLI CysA</i> /1-365 | -----  | -----      | RLHARDRK   | VGFVFCNYALFRHMTV  |
| <i>ECOLI TcyN</i> /1-250 | TARSL  | SQKSLIRQLR | QHVGFVFC   | NFNLFPHRTV        |
| <i>ECOLI YhdZ</i> /1-252 | E----- | -----      | DIRNIE     | ERVQRQEVGMVFC     |
| <i>ECOLI YehX</i> /1-308 | SLP    | -----      | VLELRRR    | MGYAICSI          |
| <i>ECOLI MalK</i> /1-371 | DTP    | -----      | PAE--      | RGVGMVFC          |
| <i>ECOLI TauB</i> /1-255 | GPG    | -----      | AE-----    | RGVVFQNEGLLPWRNV  |
| <i>ECOLI PotA</i> /1-378 | HVP    | -----      | AEN--      | RYVNTVFC          |
| <i>ECOLI PotG</i> /1-377 | QVP    | -----      | PYL--      | RPINMMFC          |

**C**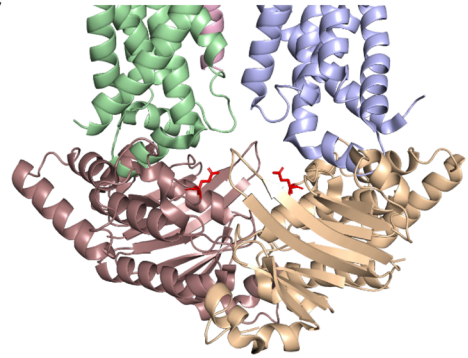**D**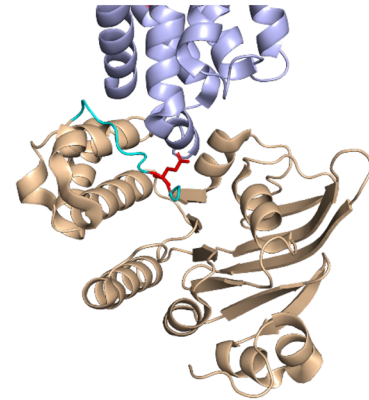

**Figure S2: Conservation of residue E86 of LptB.** Residue E86 of LptB is conserved across diverse species of gram-negative bacteria but not conserved in NBDs of other ABC transporters. **A)** A Clustal Omega alignment of LptB amongst different classes of gram-negative bacteria (Sievers *et al.*, 2011). Representative organisms were chosen based on the species sampled in Simpson *et al.* (2016). The following Uniprot accession numbers were used: *Gramella forsetii* (A0LYX6), *Anabaena variabilis* (Q3MCM5), *Elusimicrobium minutum* (B2KC16), *Sulfurihydrogenibium azorense* (C1DWB4), *Caulobacter vibrioides* (A0A0H3CCX7), *Rhizobium leguminosarum* (A0A179C0Q1), *Denitrovibrio acetiphilus* (D4H7T1), *Campylobacter jejuni* (A0A1E7NI33), *Geobacter uraniireducens* (A5G5S7), *Neisseria meningitidis* (A1KVS8), *Pseudomonas aeruginosa* (A0A071L2Z5), *Escherichia coli* (P0A9V1), and *Yersinia pestis* (A0A384L7T7). The equivalent residue to E86 in *E. coli* LptB is indicated by the red box and asterisk. The Q loop motif is marked by the cyan bar. **B)** An alignment of NBDs of other *E. coli* ABC transporters generated using Clustal Omega (Sievers *et al.*, 2011). The following Uniprot accession numbers were used: LivG (P0A9S7), LptB (P0A9V1), LivF (P22731), MetN

(P30750), LolD (P75957), FecE (P15031), CysA (P16676), TcyN (37774), YhdZ (P45769), YehX (P33360), MalK (P68187), TauB (Q47538), PotA (P69874), and PotG (P31134). The equivalent residue to E86 in *E. coli* LptB is indicated by the red box and asterisk. **C)** Section of the crystal structure of *Vibrio cholerae* LptB<sub>2</sub>FGC (PDB 6MJP) showing LptB<sub>2</sub> (monomers shown in brown and gold) interacting with the coupling helices of LptF (green) and LptG (light blue). Residue E86 is shown as red sticks in each LptB monomer. **D)** Side view of the structure from **(C)** showing an LptB monomer interacting with LptG. LptB residue E86 is shown as red sticks and the Q loop is colored cyan.



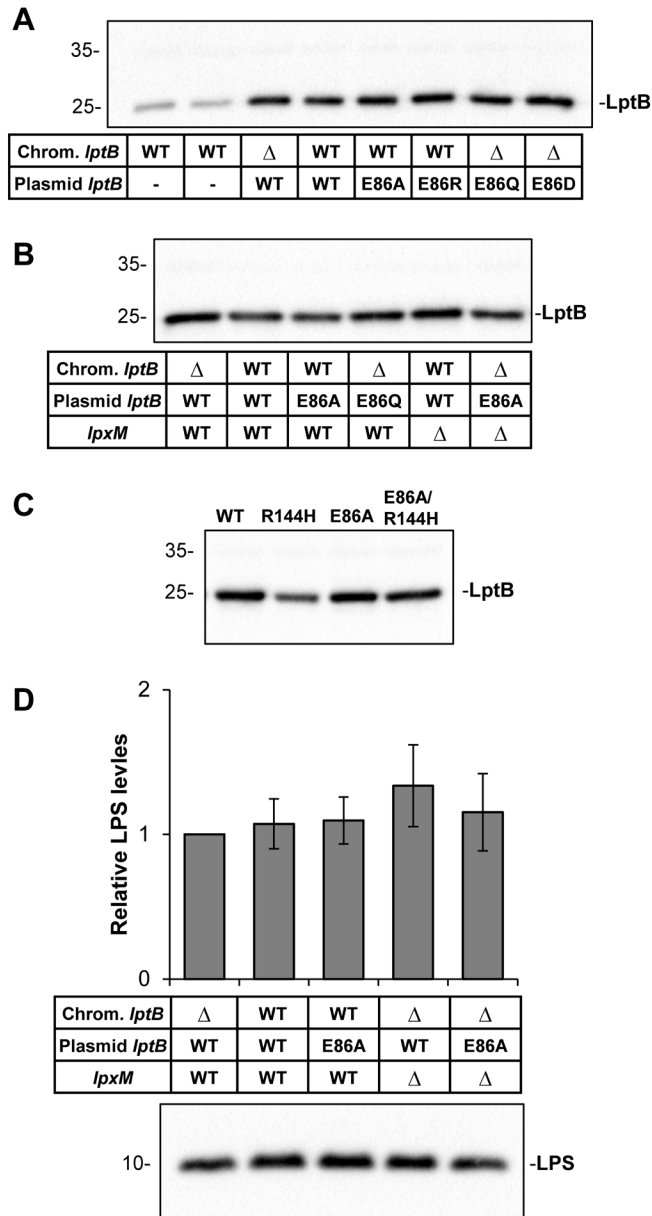

**Figure S3: Substituting residue E86 in LptB does not affect levels of LptB or LPS.**

**A)** LptB immunoblot showing no difference in levels between LptB<sup>E86</sup> variants and LptB<sup>WT</sup>. Note that pET23/42LptB produces higher levels of LptB<sup>WT</sup> than the chromosomal *lptB* allele. All blots shown are representative of at least three independent experiments. Numbers to the left of the blots indicate the band size in kDa. Strain NR4446 was used as the parental wild-type *lptB* strain. **B)** Δ*lpxM* does not suppress defective *lptB*(E86) alleles by altering the levels of LptB. Immunoblot assay of LptB levels comparing *lptB* mutants combined with Δ*lpxM*. NR4446 was used as the parent strain with wild-type *lptB*

and *lpxM* alleles. **C)** The double mutant pET23/42LptB/E86A/R144H does not complement a chromosomal *lptB* deletion, but does not alter the levels of LptB. The LptB E86A/R144H variant is not suppressed by  $\Delta$ *lpxM*. Immunoblot comparing LptB levels in wild type and *lptB* mutants. WT refers to strain NR4446. **D)**  $\Delta$ *lpxM* does not suppress *lptB*(E86A) by altering the levels of LPS in the cell. LPS levels were monitored by immunoblot and the intensity of the LPS band was quantified. Data shown represents the relative levels of LPS as determined by the ratio of the intensity of the LPS band from each sample with respect to that of the sample from the wild-type strain NR4446. Data represent the average of three independent experiments with error bars showing the standard deviation. A representative immunoblot is also shown.

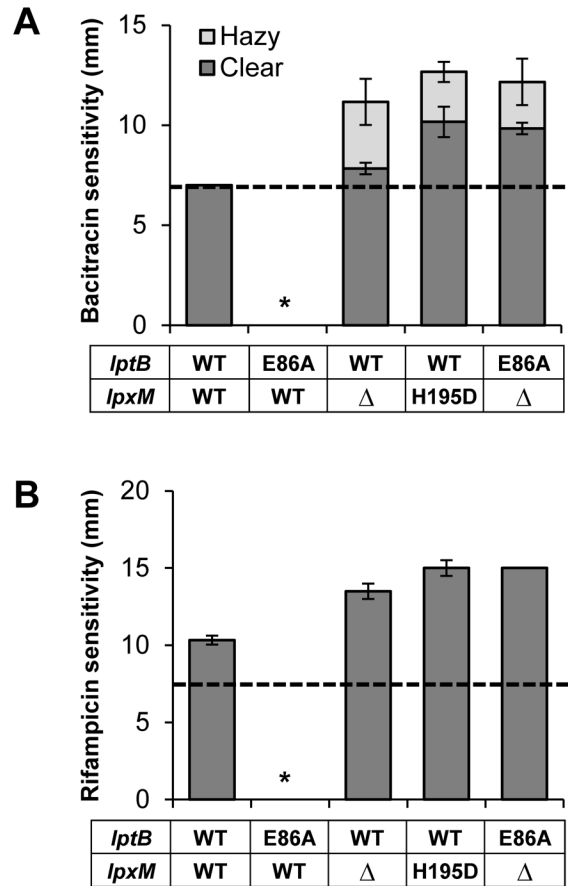

**Figure S4: *lpxM(H195D)* is a total-loss-of-function allele.** The original suppressor allele, *lpxM(H195D)*, shows equivalent suppression of *lptB(E86A)* as a deletion of *lpxM*. Thus *lpxM(H195D)* is a total-loss-of-function allele that is phenotypically equivalent to  $\Delta lpxM$ . OM permeability was measured by sensitivity to bacitracin (panel **A**) and rifampicin (panel **B**) via disc diffusion assay on LB plates. The dashed line represents the diameter of the antibiotic discs. The diameter of complete clearing (dark bars) and partial clearing (light bars) around the antibiotic disc is shown. The single *lptB(E86A)* mutant is not viable and is indicated by the asterisk. Data represent the average of three independent experiments with the error bars showing the standard deviation. No error bar indicates a standard deviation value of 0. WT refers to strain NR4446.

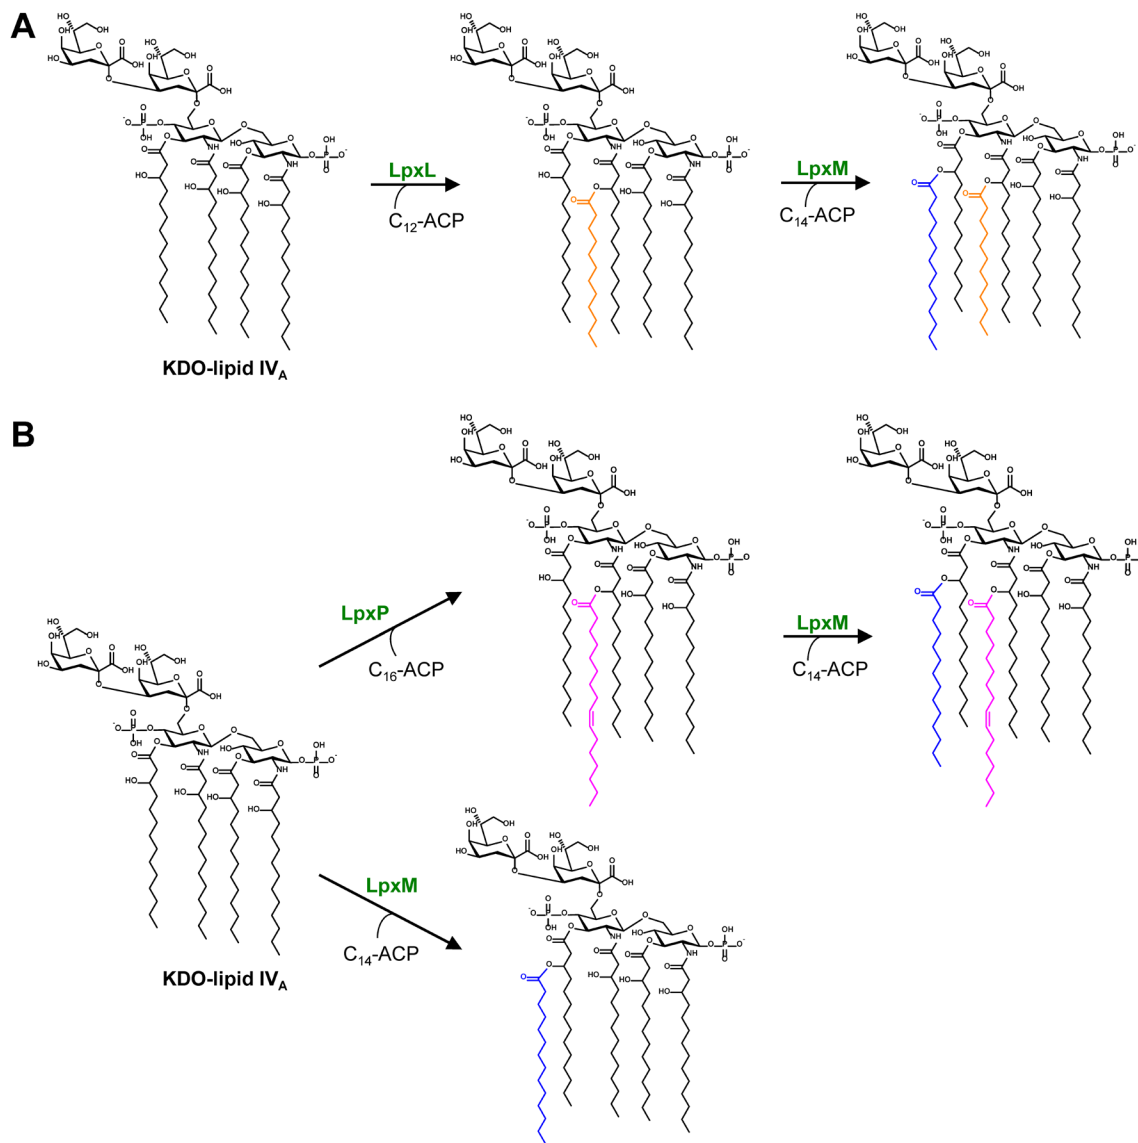

**Figure S5: Canonical and alternative pathways for lipid A biosynthesis.** Starting with lipid IV<sub>A</sub>, the acylation steps catalyzed by different acyltransferase enzymes are shown. Acyl chains added by LpxM are colored blue, those added by LpxP are pink, and those added by LpxL are orange. **A)** The canonical pathway for lipid A biosynthesis present in wild-type cells grown at 30°C as shown in Vorachek-warren, Ramirez et al. (2002). LpxL adds a lauroyl group to the 2'-hydroxymyristoyl, then LpxM adds a myristoyl group to the 3'-hydroxymyristoyl group. **B)** At low temperatures or in the absence of LpxL, LpxP adds a palmitoleoyl group to the 2'-hydroxymyristoyl; then, the product is acylated by LpxM. In the absence of LpxL, LpxM is also able to use lipid IV<sub>A</sub> as a substrate to add on the myristoyl group, but LpxP cannot use the resulting penta-acylated product as a substrate.

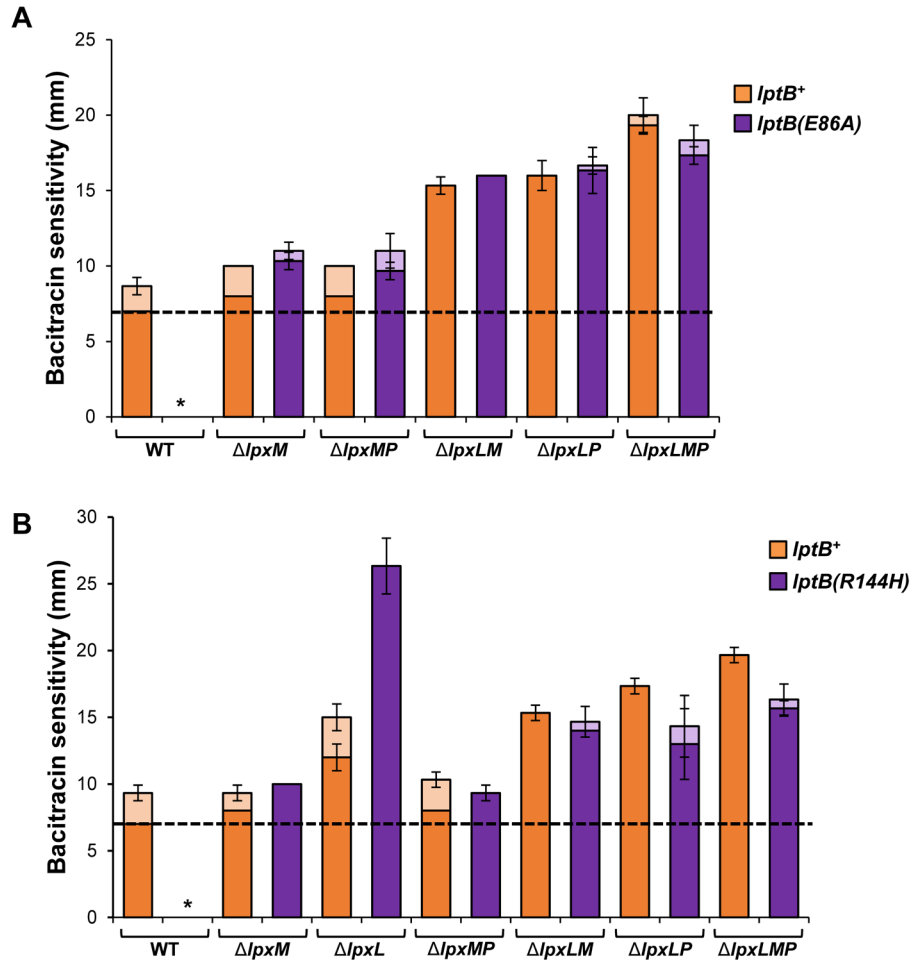

**Figure S6: *lptB*(E86A) and *lptB*(R144H) are suppressed by *lpx* null alleles.** OM permeability defects in the haploid *lptB*(E86A) (panel **A**) and *lptB*(R144H) (panel **B**) mutants are suppressed by the loss of lipid A acyltransferases. In these haploid strains, *lptB* alleles were encoded in pET23/42/LptB, pET23/42/LptB/E86A (shown in **A**), and pET23/42/LptB/R144H (shown in **B**). OM permeability was assessed by determining sensitivity to bacitracin using a disc diffusion assay on LB plates. Asterisks indicate that strains are unable to grow on LB. Any combinations of *lpx* null alleles that do not suppress these mutant *lptB* alleles are also not able to grow, so they are not shown. Clear and hazy zones around the disc are shown in dark and light colored bars respectively. Data shown are representative of at least three independent experiments. The diameter of the bacitracin disc is indicated with the dashed line. Data represent the average of three independent experiments with the error bars indicating the standard deviation. No error bar indicates a standard deviation value of 0. WT refers to strain NR4446.

**A**

|                                | Phenotype       |
|--------------------------------|-----------------|
| <i>lptG(L74P)</i>              | Functional      |
| <i>lptG(A110V)</i>             | Partial LOF     |
| <i>lptB(R144H)</i>             | Conditional LOF |
| <i>lptB(R144H) lptG(L74P)</i>  | Partial LOF     |
| <i>lptB(R144H) lptG(A110V)</i> | Conditional LOF |

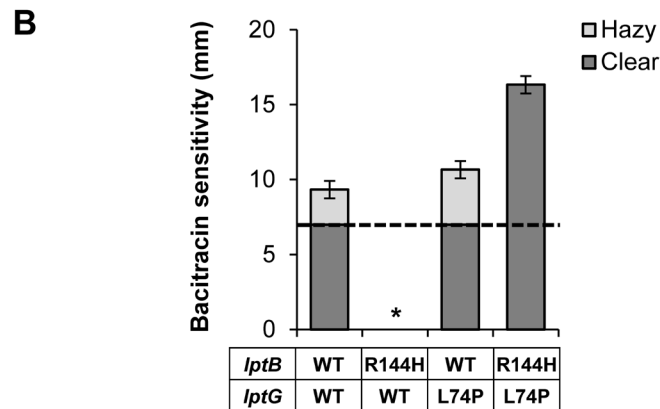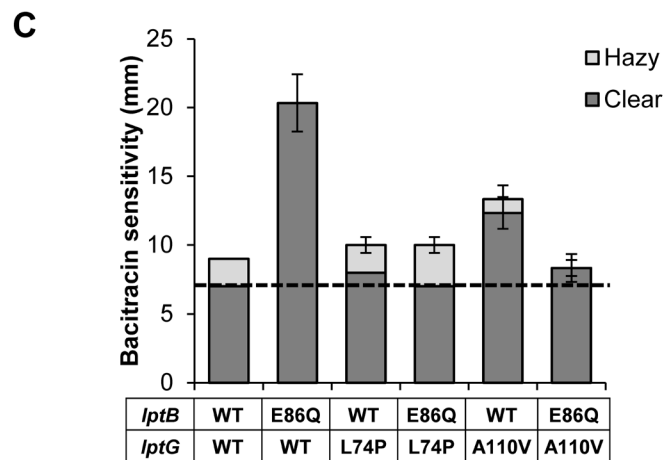

**Figure S7: Analysis of suppression by *lptG(L74P)* and *lptG(A110V)* of defects caused by *lptB(E86Q)* and *lptB(R144H)*. A) *lptB(R144H)* is suppressed by *lptG(L74P)* but not *lptG(A110V)*. Plasmid-borne *lptB(R144H)* allele was assessed for its ability to complement chromosomal  $\Delta lptB$  in strains carrying chromosomal *lptG*<sup>+</sup>, *lptG(L74P)* or *lptG(A110V)* alleles. Table summarizes the results of the *lptB(R144H)* complementation tests. Functional refers to substitutions that confer no defects, partial LOF (loss of function) refers to those that confer OM-permeability defects, conditional LOF refers to those that prevent complementation of chromosomal  $\Delta lptB$  in LB but not in minimal**

media, and total LOF refers to those that do not complement chromosomal  $\Delta lptB$  under any condition tested. **B)** *lptB(R144H)* is suppressed by *lptG(L74P)*. OM permeability was assessed by measuring the sensitivity to bacitracin on LB plates. Data shown are the average of three independent experiments with the error bars representing the standard deviation. The diameter of the disc containing bacitracin is indicated by the dashed line. The single *lptB(R144H)* mutant is not viable and is indicated by the asterisk. **C)** *lptB(E86Q)* is suppressed by both *lptG(L74P)* and *lptG(A110V)*. Plasmid-borne *lptB(E86Q)* allele was assessed for its ability to complement chromosomal  $\Delta lptB$  in strains carrying chromosomal *lptG*<sup>+</sup>, *lptG(L74P)* or *lptG(A110V)*. All combinations complemented and their OM permeability was determined by disc diffusion assay. Data represent the average of three independent experiments with the error bars indicating the standard deviation. No error bar indicates a standard deviation value of 0. NR4831 was used as the parental wild-type *lptB lptG* strain.

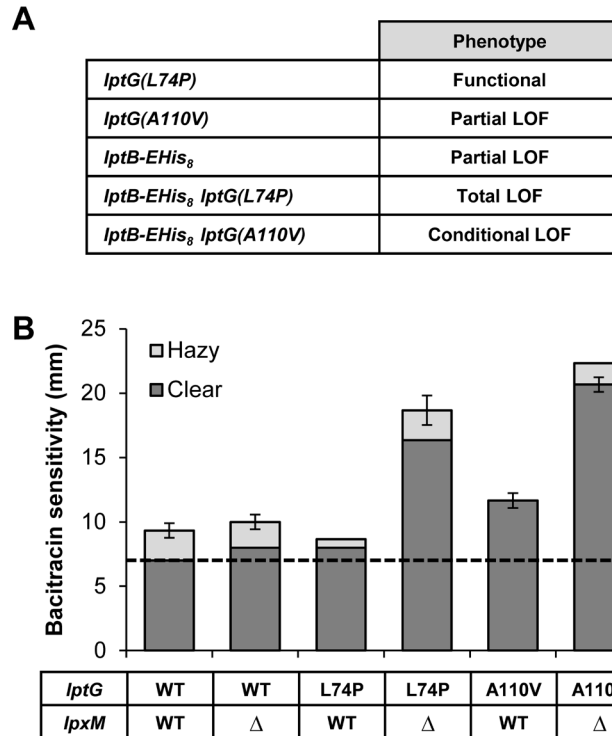

**Figure S8: *lptG(L74P)* and *lptG(A110V)* are synthetic defective with *lptB-EHis<sub>8</sub>* and  $\Delta$ *lpxM*.** **A)** *lptG(L74P)* and *lptG(A110V)* are synthetic lethal with the *lptB-EHis<sub>8</sub>* allele. Plasmid-borne *lptB-EHis<sub>8</sub>* was assessed for its ability to complement chromosomal  $\Delta$ *lptB* in strains carrying chromosomal *lptG*<sup>+</sup>, *lptG(L74P)* or *lptG(A110V)*. Table summarizing the complementation results. Functional refers to substitutions that confer no defects, partial LOF (loss of function) refers to those that confer OM-permeability defects, conditional LOF refers to those that prevent complementation of chromosomal  $\Delta$ *lptB* in LB but not in minimal media, and total LOF refers to those that do not complement chromosomal  $\Delta$ *lptB* under any condition tested. **B)** *lptG(L74P)* and *lptG(A110V)* are synthetic defective with  $\Delta$ *lpxM*. Chromosomal *lpxM* gene was deleted in strains with chromosomal *lptG*<sup>+</sup>, *lptG(L74P)* or *lptG(A110V)* alleles. OM-permeability defects were determined by assessing sensitivity to bacitracin using a disc diffusion assays. Dark bars represent zones of complete clearing, light bars represent zones of partial clearing around the disc. The dashed line indicates the diameter of the bacitracin disc. Data represent the average of three independent experiments with the error bars indicating the standard deviation. No error bar indicates a standard deviation value of 0. Strain NR4831 was used as the parental wild-type *lptB lptG* strain.



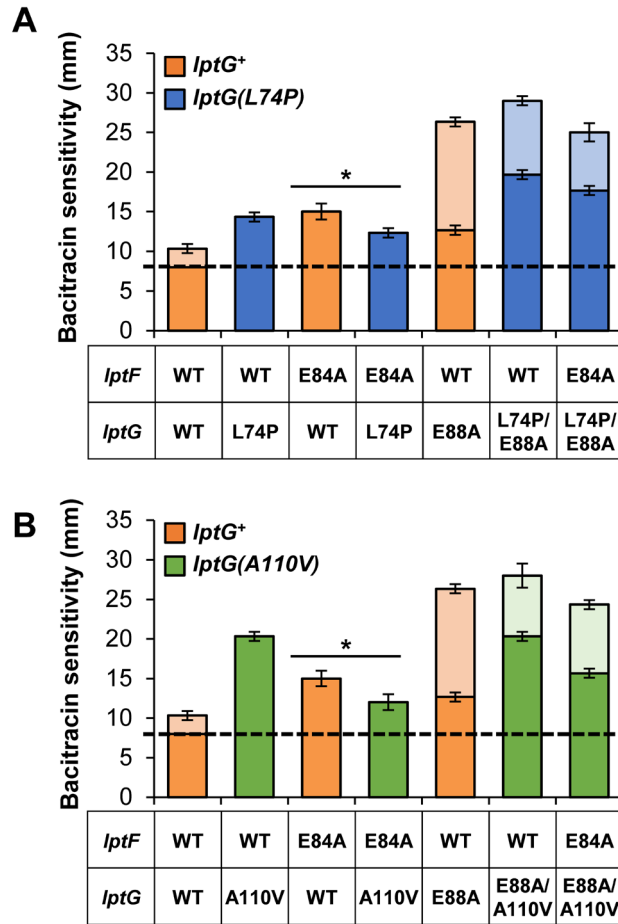

**Figure S9: *lptG(L74P)* and *lptG(A110V)* only suppress defects in the coupling helix of *LptF*.** **A)** *lptG(L74P)* suppresses *lptF(E84A)* alone or in combination with *lptG(E88A)*. **B)** *lptG(A110V)* suppresses *lptF(E84A)* alone or in combination with *lptG(E88A)*. Haploid strains carrying alleles with substitutions in the conserved glutamates of the coupling helices [*lptF(E84A)*, *lptG(E88A)*, and *lptF(E84A) lptG(E88A)*] were each combined with either *lptG(L74P)* (**A**) or *lptG(A110V)* (**B**). All *lptFG* alleles were encoded in the pBAD18LptFG3 plasmid and the chromosomal wild-type *lptFG* alleles were deleted. OM permeability of these strains was assessed via disc diffusion assay measuring sensitivity to bacitracin on LB plates. Clear zones around the disc are shown in darker colored bars, hazy zones around the disc are shown in lighter colored bars. Disc diameter indicated by the dashed line. Since the double mutant *lptF(E84A) lptG(E88A)* does not complement on LB, it is not shown. Data represent the average of three independent experiments. The error bars show the standard deviation. Strain NR2761 was used as the parental wild-

type *lptFG* strain. An unpaired two-tailed Student's *t*-test was used to assess the significance of difference between *lptF(E84A)* and *lptF(E84A)* combined with either *lptG(L74P)* or *lptG(A110V)*. \* indicates  $P < 0.05$ .

## REFERENCES

- Bertani, B.R., Taylor, R.J., Nagy, E., Kahne, D., and Ruiz, N. (2018) A cluster of residues in the lipopolysaccharide exporter that selects substrate variants for transport to the outer membrane. *Molecular Microbiology* **109**: 541-554.
- Ruiz, N., Wu, T., Kahne, D., and Silhavy, T.J. (2006) Probing the barrier function of the outer membrane with chemical conditionality. *ACS Chemical Biology* **1**: 385-395.
- Sherman, D.J., Lazarus, M.B., Murphy, L., Liu, C., Walker, S., Ruiz, N., and Kahne, D. (2014) Decoupling catalytic activity from biological function of the ATPase that powers lipopolysaccharide transport. *Proceedings of the National Academy of Sciences of the United States of America* **111**: 4982-4987.
- Sievers, F., Wilm, A., Dineen, D., Gibson, T.J., Karplus, K., Li, W., Lopez, R., McWilliam, H., Remmert, M., Soding, J., Thompson, J.D., and Higgins, D.G. (2011) Fast, scalable generation of high-quality protein multiple sequence alignments using Clustal Omega. *Molecular Systems Biology* **7**: 539.
- Simpson, B.W., Owens, T.W., Orabella, M.J., Davis, R.M., May, J.M., Trauger, S.A., Kahne, D., and Ruiz, N. (2016) Identification of residues in the lipopolysaccharide ABC transporter that coordinate ATPase activity with extractor function. *mBio* **7**: 13-17.
- Simpson, B.W., Pahil, K.S., Owens, T.W., Lundstedt, E.A., Davis, R.M., Kahne, D., and Ruiz, N. (2019) Combining mutations that inhibit two distinct steps of the ATP hydrolysis cycle restores wild-type function in the lipopolysaccharide transporter and shows that ATP binding triggers transport. *mBio* **10**: 1-18.
